# Supplementary material
Source: Royal Society of Chemistry journal article supplement (doi:10.1039/d6cc01378c)
Supplement: d6cc01378c1.pdf [file d6cc01378c1.pdf]

## [Electronic Supplementary Information](#)

### **Lattice Doping and NiO Synergistic Decoration for Enhanced CO<sub>2</sub> Electrolysis in Solid Oxide Electrolysis Cell**

Maoyu Kang,<sup>a</sup> Shu Xiao,<sup>a</sup> Qiran Zhang,<sup>a</sup> Jinhuan Cai,<sup>a</sup> Dunkui Li,<sup>a</sup> Chang-An Zhou,<sup>\*a</sup> Hongjiao Li,<sup>a</sup> Chao Wang,<sup>a</sup> Lei Song,<sup>a</sup> Kui Ma,<sup>\*a</sup> and Hairong Yue<sup>a,b,c</sup>

- a. *Low-Carbon Technology and Chemical Reaction Engineering Laboratory, School of Chemical Engineering, Sichuan University, Chengdu 610065, China.*
- b. *Institute of New Energy and Low-Carbon Technology, Sichuan University, Chengdu 610207, China.*
- c. *Coal Mining Research Institute, China Coal Technology and Engineering Group, Beijing 100013, China*

\*Corresponding author: [kuima@scu.edu.cn](mailto:kuima@scu.edu.cn), TEL/FAX: (+86) 28-85465318

### **Experimental section**

#### **1. Material synthesis**

The NiO/Ni-Sm<sub>0.2</sub>Ce<sub>0.8</sub>O<sub>2-δ-x</sub> cathode powders were synthesized via the sol-gel method, where x (x = 0.100, 0.125, 0.150, and 0.175) represents the molar ratio of Ni species introduced into the Sm<sub>0.2</sub>Ce<sub>0.8</sub>O<sub>2-δ</sub> (SDC). Stoichiometric amounts of Sm(NO<sub>3</sub>)<sub>3</sub>·6H<sub>2</sub>O and Ce(NO<sub>3</sub>)<sub>3</sub>·6H<sub>2</sub>O were dissolved in an appropriate volume of deionized water, with citric acid and polyvinyl alcohol added in specified proportions. The solution was continuously heated and stirred in a 150 °C oil bath, then dried to obtain the precursor powders. The powders were ground and calcined at 1000 °C for 5 h in air to obtain pristine SDC powders. The NiO/Ni-SDC-x samples were prepared according to the same procedure with additional Ni(NO<sub>3</sub>)<sub>2</sub>·6H<sub>2</sub>O. And the molar ratio of metal nitrates was Ni:Sm:Ce = x:(0.2-x):0.8. Additionally La<sub>0.6</sub>Sr<sub>0.4</sub>Co<sub>0.2</sub>Fe<sub>0.8</sub>O<sub>3-δ</sub> (LSCF) powders were synthesized using the same method. LSCF powders and SDC

---

powders were mixed and ground at a weight ratio of 3:2 to obtain the LSCF-SDC anode composite powders.

## **2. Cell fabrication**

An electrolyte cell with an NiO/Ni-SDC|SDC|LSGM|LSCF-SDC structure was prepared, where SDC serves as a barrier layer to ensure electrode-electrolyte bonding. LSGM electrolyte was prepared via tape-casting technique, with a thickness of approximately 210  $\mu\text{m}$  and a diameter of 15 mm. Electrode slurry was prepared by mixing electrode powders with organic binder at a weight ratio of 5:3. The slurry was screen-printed onto both sides of the electrolyte and sintered at 1150  $^{\circ}\text{C}$  for 2 h to form electrodes. Silver paste was coated onto the electrodes as current collectors.

## **3. Physicochemical characterization**

X-ray diffraction (XRD) testing was performed at room temperature using an XRD instrument (Shimadzu, Japan, XRD6100) equipped with a Cu  $K\alpha$  target ( $\lambda=1.5418 \text{ \AA}$ ). Scanning electron microscopy (SEM) images were collected on a ZEISS Sigma 300 instrument. Transmission electron microscopy (TEM) images were obtained using a JEOL JEM-F200 instrument. Raman spectra were acquired using a Horiba LabRAM HR Evolution Raman spectrometer (532 nm). Powder X-ray photoelectron spectroscopy (XPS) analysis was performed using a Thermo Scientific K-Alpha spectrometer, with binding energy calibrated using C 1s (284.8 eV). Carbon dioxide temperature-programmed desorption ( $\text{CO}_2$ -TPD) testing of the powders was performed on a Micromeritics Autochem III 2930 instrument. Electron paramagnetic resonance (EPR) testing was conducted on a Bruker EMX Plus spectrometer.

## **4. Electrochemical measurements**

The electrochemical performance of the cell was tested on an alumina tube placed inside a tubular furnace, with the gas chamber sealed using a high-temperature fused glass ring. A 95%  $\text{CO}_2$ -5%  $\text{N}_2$  gas flowed toward the cathode at a rate of 40  $\text{ml min}^{-1}$ , while the anode side was exposed to static ambient air. **Electrochemical testing was conducted within the 700-800  $^{\circ}\text{C}$  range.** Electrochemical performance was

---

evaluated using current density-voltage (J-V), electrochemical impedance spectroscopy (EIS) measurements and constant potential on a Donghua 7002A electrochemical workstation. The produced gas CO was analyzed by gas chromatography (GC2060) to calculate Faraday efficiency. J-V curves were measured at a scan rate of  $10 \text{ mV s}^{-1}$  within the 0-1.6 V range. EIS was performed at an amplitude of 10 mV across the 0.01– $10^5$  Hz frequency range. The obtained EIS data were analyzed using the relaxation time distribution (DRT) tool and fitted with Zview software.

## 5. Density functional theory (DFT) calculation

DFT calculations were conducted using the Vienna ab initio simulation package (VASP 6.0).<sup>1</sup> The calculations employed Projector Augmented Wave (PAW) potentials to describe ionic cores<sup>2</sup> and Perdew-Burke-Ernzerhof (PBE) exchange-correlation functional<sup>3</sup> with Hubbard U corrections<sup>4</sup> for correct electronic structures (U–J values were 6.0 eV for Ce and Sm, and 5.96 eV for Ni). The thermodynamically most favorable one is used for data analysis. The cut-off kinetic energy of 450 eV and the convergence criteria of  $10^{-6}$  eV was used for all calculations. A geometry optimization scheme using a conjugate gradient algorithm was used to optimize the atomic positions, cell shapes, and volumes until the maximum force on any atom was less than  $0.02 \text{ eV}\cdot\text{\AA}^{-1}$ . The Brillouin zone of all systems was sampled using a Monkhorst-Pack grid.<sup>5</sup> The Fermi energy levels were smoothed using Gaussian smearing with a Gaussian width of 0.02 eV.

## **Figures and Tables**

**Table S1** Proportion of O species in SDC and NiO/Ni-SDC-x sample obtained by XPS analysis.

| Sample           | Relative content (%) |                |                |
|------------------|----------------------|----------------|----------------|
|                  | O <sub>L</sub>       | O <sub>R</sub> | O <sub>S</sub> |
| SDC              | 44.23                | 17.89          | 37.88          |
| NiO/Ni-SDC-0.100 | 40.52                | 23.64          | 35.84          |
| NiO/Ni-SDC-0.125 | 37.48                | 28.31          | 34.21          |
| NiO/Ni-SDC-0.150 | 29.09                | 33.83          | 37.08          |
| NiO/Ni-SDC-0.175 | 24.54                | 38.71          | 36.75          |

**Table S2** Equivalent circuit fitting results of SDC and NiO/Ni-SDC-0.150 cell at 800 °C and 1.4 V.

| Cell             | Ohmic resistance          | Polarizational resistance ( $\Omega \text{ cm}^2$ ) |                 |                 |                        |
|------------------|---------------------------|-----------------------------------------------------|-----------------|-----------------|------------------------|
|                  | ( $\Omega \text{ cm}^2$ ) | R <sub>p1</sub>                                     | R <sub>p2</sub> | R <sub>p3</sub> | R <sub>p</sub> (total) |
| SDC              | 0.144                     | 0.072                                               | 0.082           | 0.146           | 0.300                  |
| NiO/Ni-SDC-0.150 | 0.153                     | 0.054                                               | 0.047           | 0.076           | 0.177                  |

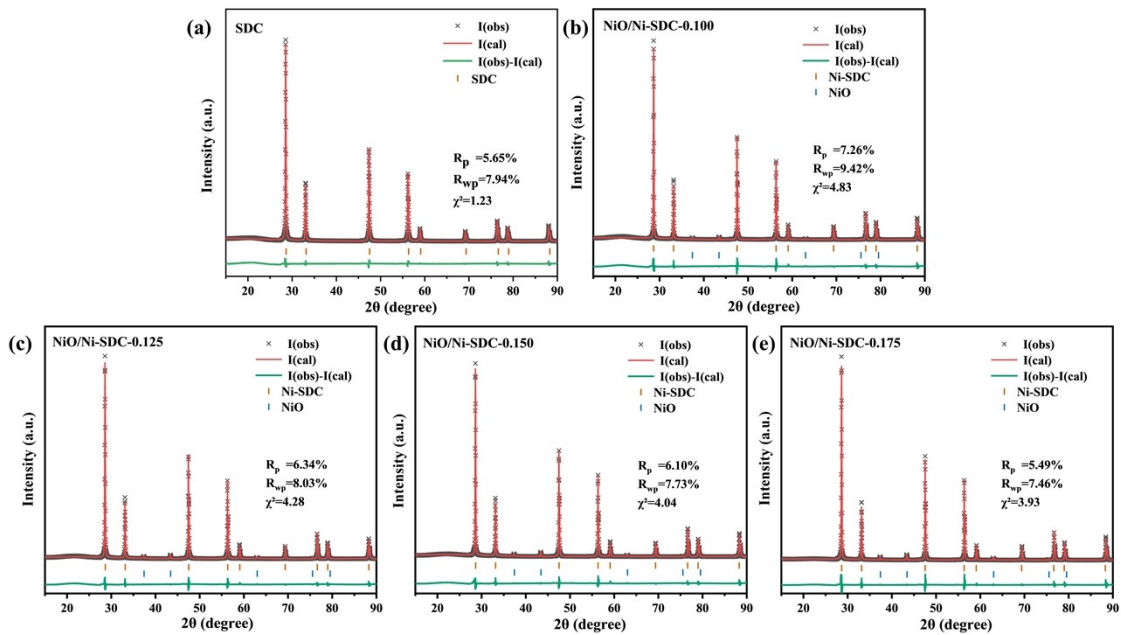

**Fig. S1** Rietveld refinement profiles of (a) SDC, (b) NiO/Ni-SDC-0.100, (c) NiO/Ni-SDC-0.125, (d) NiO/Ni-SDC-0.150, and (e) NiO/Ni-SDC-0.175.

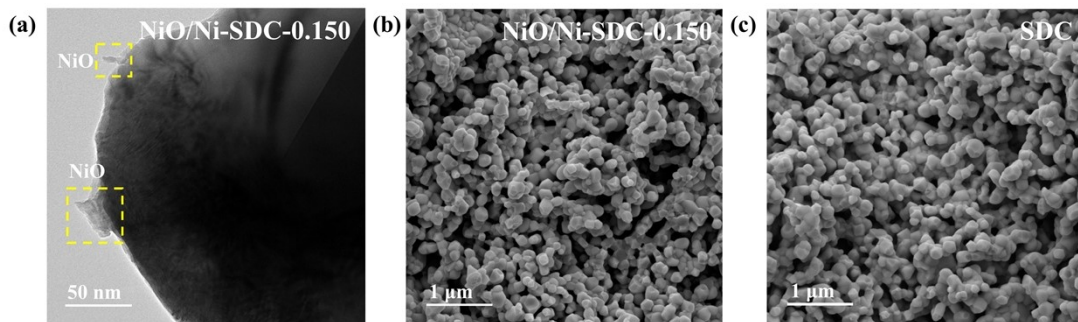

**Fig. S2** (a) TEM characterization of NiO/Ni-SDC-0.150 powders. SEM characterization of (b) NiO/Ni-SDC-0.150 and (c) SDC powders.

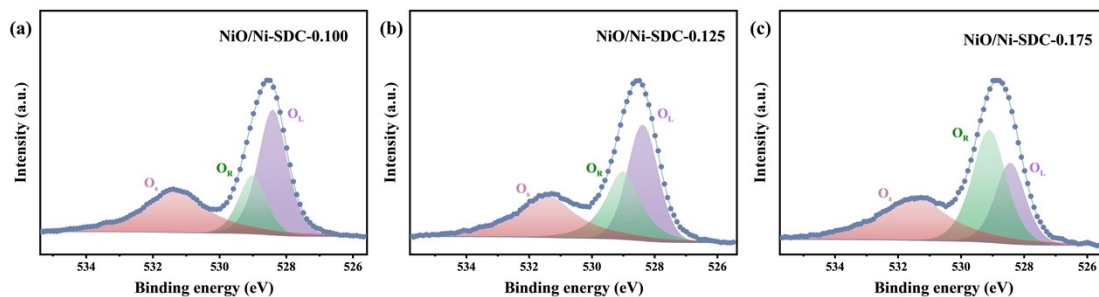

**Fig. S3** XPS spectra of O 1s for (a) NiO/Ni-SDC-0.100, (b) NiO/Ni-SDC-0.125 and (c) NiO/Ni-SDC-0.175.

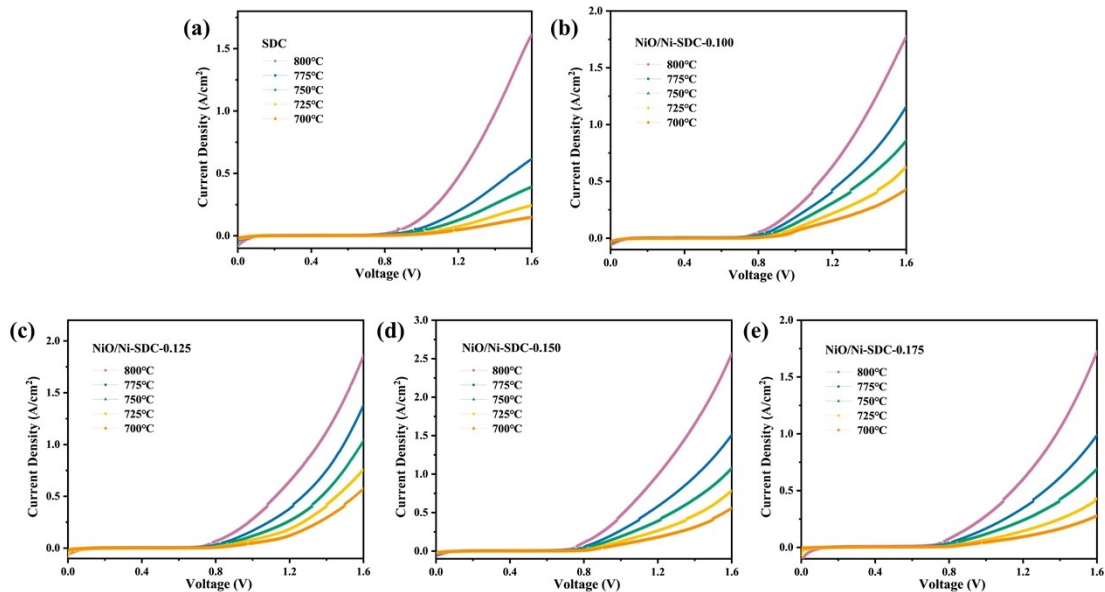

**Fig. S4** J-V curves at 700-800 °C of (a) SDC, (b) NiO/Ni-SDC-0.100, (c) NiO/Ni-SDC-0.125, (d) NiO/Ni-SDC-0.150 and (e) NiO/Ni-SDC-0.175.

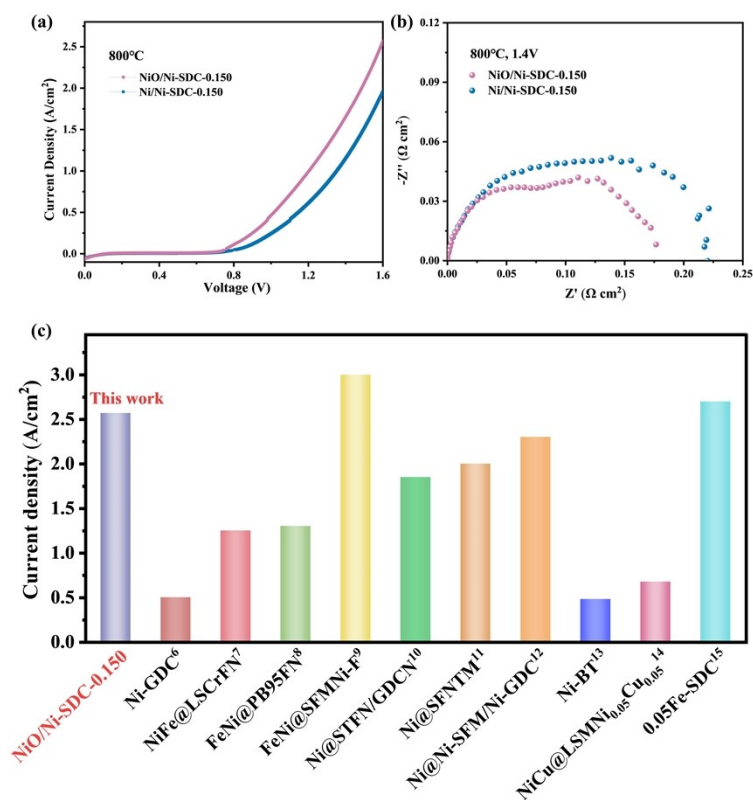

**Fig. S5** (a) J-V curves at 800 °C of NiO/Ni-SDC-0.150 and reduced NiO/Ni-SDC-0.150. (b) EIS spectra recorded at 800 °C, 1.4 V of NiO/Ni-SDC-0.150 and reduced NiO/Ni-SDC-0.150. (c) Comparison of the CO<sub>2</sub> electrolysis performance with other advance electrodes<sup>6-15</sup> testing at 800 °C, 1.6 V.

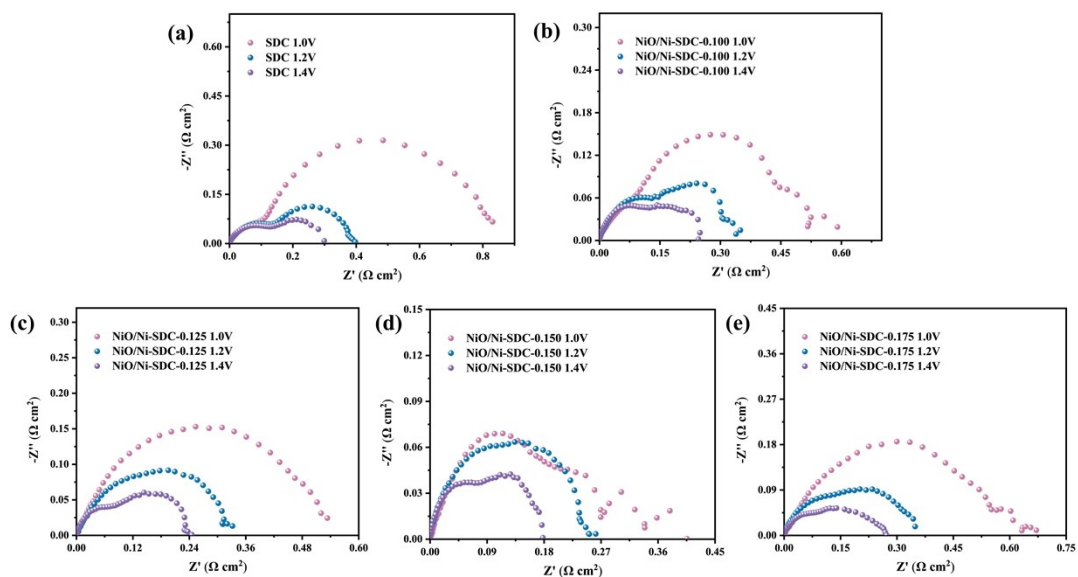

**Fig. S6** EIS spectra recorded at 800 °C under voltages of 1.0 V, 1.2 V, and 1.4 V of (a) SDC, (b) NiO/Ni-SDC-0.100, (c) NiO/Ni-SDC-0.125, (d) NiO/Ni-SDC-0.150 and (e) NiO/Ni-SDC-0.175.

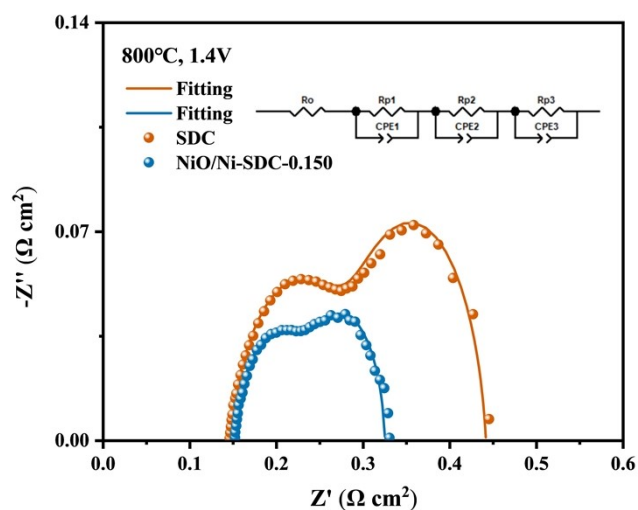

**Fig. S7** CNLS-fitted EIS spectra of SDC and NiO/Ni-SDC-0.150 cell at 800 °C and 1.4 V.

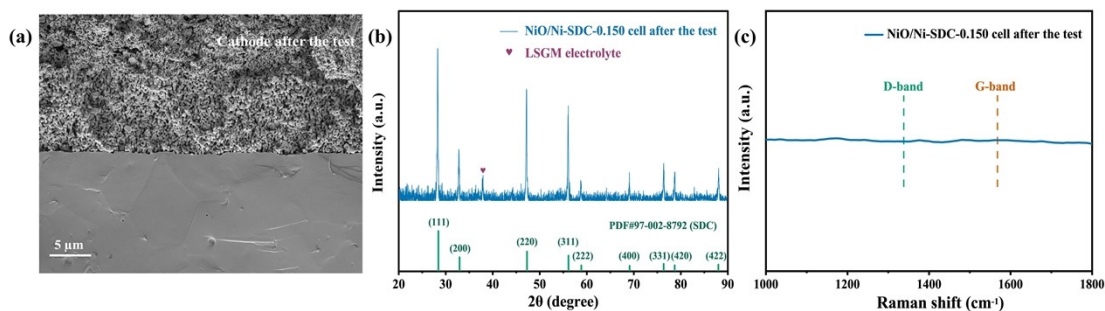

**Fig. S8** (a) SEM characterization of the cross section of NiO/Ni-SDC-0.150 cathode/electrolyte structure after the long-term stability test. (b) XRD patterns of the NiO/Ni-SDC-0.150 cell after the test. (c) Raman spectra after long-term stability test.

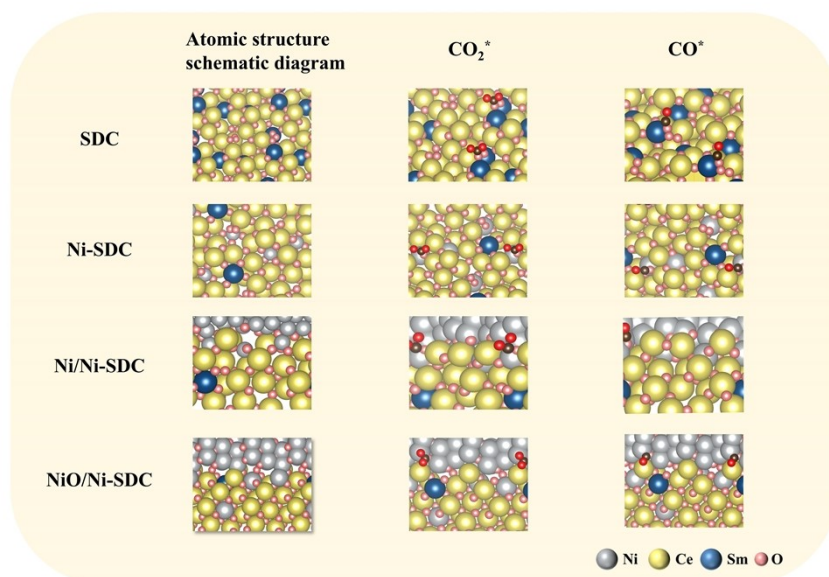

**Fig. S9** Atomic structure model of SDC, Ni-SDC, Ni/Ni-SDC and NiO/Ni-SDC.

For the DFT calculations, the following structural models were constructed: the pristine SDC; SDC doped with nickel into the lattice (Ni-SDC); and SDC with Ni species partially incorporated into the SDC lattice and partially distributed on the surface as NiO (NiO/Ni-SDC, this work), part of the Ni species enters the SDC lattice, while the others are distributed as the Ni metal on the surface (Ni/Ni-SDC).

---

## Reference

- 1 G. Kresse and J. Furthmüller, *Phys. Rev. B*, 1996, **54**, 11169-11186.
- 2 G. Kresse and D. Joubert, *Phys. Rev. B*, 1999, **59**, 1758-1775.
- 3 J. P. Perdew, K. Burke and M. Ernzerhof, *Phys. Rev. Lett.*, 1996, **77**, 3865-3868.
- 4 A. J. Cohen, P. Mori-Sánchez and W. Yang, *Science*, 2008, **321**, 792-794.
- 5 D. J. Chadi, *Phys. Rev. B*, 1977, **16**, 1746-1747.
- 6 A. Abu Hajar, D. A. Daramola and J. P. Tremblay, *Electrochimica Acta*, 2024, **485**, 144052.
- 7 M. Wang, N. Li, Q. Shen, Z. Zhan and C. Chen, *Sustainable Energy Fuels*, 2022, **6**, 2038-2044.
- 8 X. Wang, H. Hu, C. Xie, Y. Wang, H. Li and X. Ding, *J. Mater. Chem. A*, 2024, **12**, 11701-11709.
- 9 S. Zhang, Y. Jiang, H. Han, Y. Li and C. Xia, *ACS Appl. Mater. Interfaces*, 2022, **14**, 28854-28864.
- 10 T. Wang, N. Sun, R. Wang, D. Dong, T. Wei and Z. Wang, *Journal of Power Sources*, 2025, **626**, 235821.
- 11 S. Zhen, L. Zhang, C. Xu, D. Zhang, Q. Yi, W. Sun and K. Sun, *Front. Chem.*, 2022, **10**, 1027713.
- 12 F. Hu, Y. Ling, S. Fang, L. Sui, H. Xiao, Y. Huang, S. Wang, B. He and L. Zhao, *Applied Catalysis B: Environmental*, 2023, **337**, 122968.
- 13 D. Aini, M.-S. Lin, R. Ismail, A. Parkash, Y.-L. He, P.-C. Ma and A. Kadier, *International Journal of Hydrogen Energy*, 2025, **191**, 152250.
- 14 X. Gao, L. Ye and K. Xie, *Fuel*, 2024, **371**, 131959.
- 15 L. Zhang, Y. Jiang, K. Zhu, N. Shi, Z. U. Rehman, R. Peng and C. Xia, *Small Methods*, 2024, **8**, 2301686.
